# Supplementary material for: Two biomass material-derived self-doped (N/O) porous carbons from waste coriander and lilac with high specific surface areas and high capacitance for supercapacitors
Source: Royal Society of Chemistry journal article supplement (doi:10.1039/d3nj04883g), 2023-11-29
Supplement: d3nj04883g1.pdf [file d3nj04883g1.pdf]

## Electronic Supplementary Information

### **Table of Content:**

*1. General Methods*

*2. Characterization of the electrode materials*

*3. Electrochemical characterization of the electrodes*

*4. Electrochemical characterization of the SSCs*

## 1. General Methods

**Table S1** The production yield of carbon materials.

|         | raw mass<br>(mg) | mass after<br>carbonization<br>(mg) | mass after<br>activation<br>(mg) | production yield (%) |
|---------|------------------|-------------------------------------|----------------------------------|----------------------|
| LPC-600 | 1446             | 514                                 | 203                              | 14                   |
| CPC-600 | 1576             | 614                                 | 205                              | 13                   |

**Materials Characterization:** All reagents are commercial and were used as received. The morphology of the samples was analyzed by scanning electron microscopy (SEM; SU-70, Hitachi) equipped with an energy-dispersive X-ray (EDX) spectrometer. The X-ray powder diffraction (XRD) spectra were collected on a Rigaku D/max2600 X-ray diffractometer. X-ray photoelectron spectroscopy (XPS) tests were performed on a Thermo ESCALAB 250XI instrument using monochromatic AlK $\alpha$ -ADES (ht=1486.6 eV) as the source. The Brunauer-Emmett-Teller (BET) surface area were performed by N<sub>2</sub> adsorption measurements at 77.3 K using a Nova 2000E.

## 2. Characterization of the electrode materials

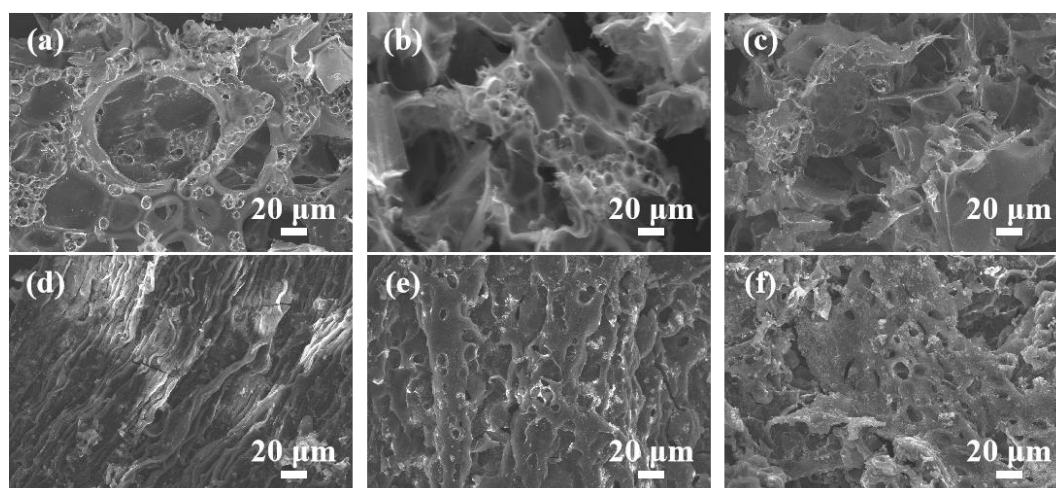

**Fig. S1** The SEM images of (a) CPC-500, (b) CPC-600, (c) CPC-700 and (d) LPC-500, (e) LPC-600, (f) LPC-700.

**Table S2** Element contents of the samples.

| Elemental analysis |         |         |         |
|--------------------|---------|---------|---------|
| Samples            | C (wt%) | N (wt%) | O (wt%) |
| CPC-500            | 73.7    | 6.1     | 20.2    |
| CPC-600            | 74.9    | 7.0     | 18.1    |
| CPC-700            | 79.7    | 7.5     | 12.8    |
| LPC-500            | 72.5    | 6.3     | 21.2    |
| LPC-600            | 80.7    | 7.9     | 11.4    |
| LPC-700            | 80.0    | 9.7     | 10.3    |

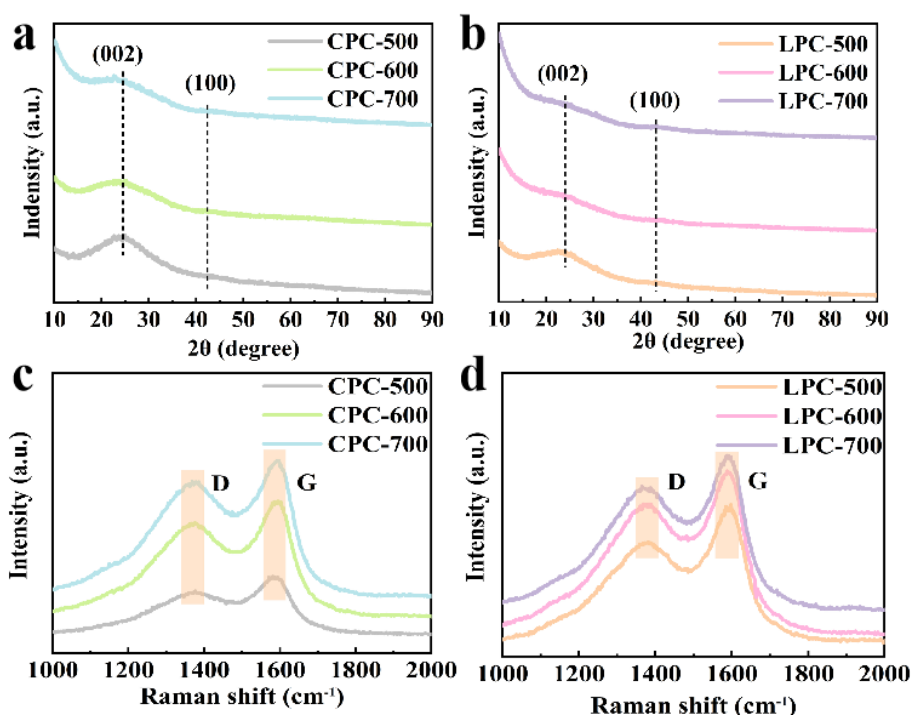

**Fig. S2** (a, b) The XRD patterns of CPC-x and LPC-x samples. (c, d) The Raman spectrum of CPC-x and LPC-x samples.

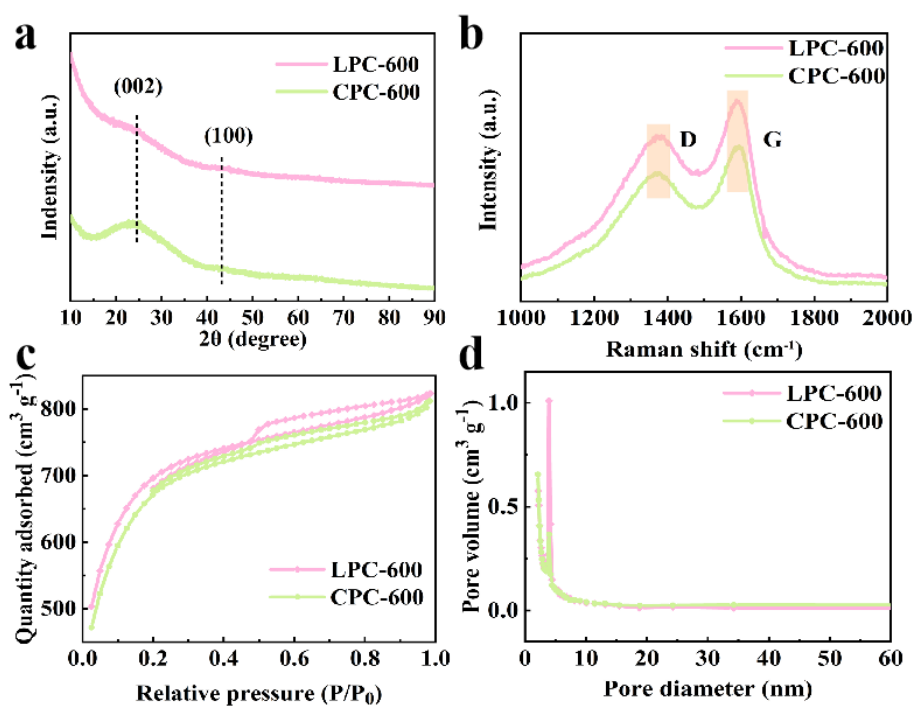

**Fig. S3** (a) The XRD patterns, (b) Raman spectrum, (c) N<sub>2</sub> adsorption-desorption isotherms and (d) pore size distributions of CPC-600 and LPC-600 samples.

**Table S3** The XPS test data of CPC-600.

| Chemical element | Name  | Peak BE | Area(P)CPS.ev | Atommic% |
|------------------|-------|---------|---------------|----------|
| C                | C=C   | 284.00  | 21304.77      | 57.61    |
|                  | C-N   | 285.20  | 4363.91       | 11.80    |
|                  | C-OH  | 285.97  | 4710.15       | 12.74    |
|                  | C=O   | 288.10  | 6603.80       | 17.86    |
| N                | N-6   | 398.60  | 519.42        | 44.09    |
|                  | N-5   | 399.80  | 328.83        | 27.91    |
|                  | N-X   | 402.60  | 329.80        | 28.00    |
| O                | C=O   | 531.27  | 4389.67       | 29.40    |
|                  | C-OH  | 532.20  | 4524.19       | 30.31    |
|                  | C-O-C | 532.90  | 6014.50       | 40.29    |

**Table S4** The XPS test data of LPC-600.

| Chemical element | Name | Peak BE | Area(P)CPS.ev | Atomic% |
|------------------|------|---------|---------------|---------|
| C                | C=C  | 284.10  | 21983.40      | 71.85   |
|                  | C-N  | 285.70  | 2914.74       | 9.53    |
|                  | C-O  | 286.50  | 2925.88       | 9.56    |
|                  | C=O  | 288.10  | 2771.04       | 9.06    |
| N                | N-6  | 398.10  | 438.00        | 39.36   |
|                  | N-5  | 399.20  | 328.93        | 29.56   |
|                  | N-X  | 402.20  | 346.01        | 31.09   |
| O                | C=O  | 531.50  | 5155.95       | 32.10   |
|                  | C-OH | 532.20  | 10907.98      | 67.90   |

### 3. Electrochemical characterization of the electrodes

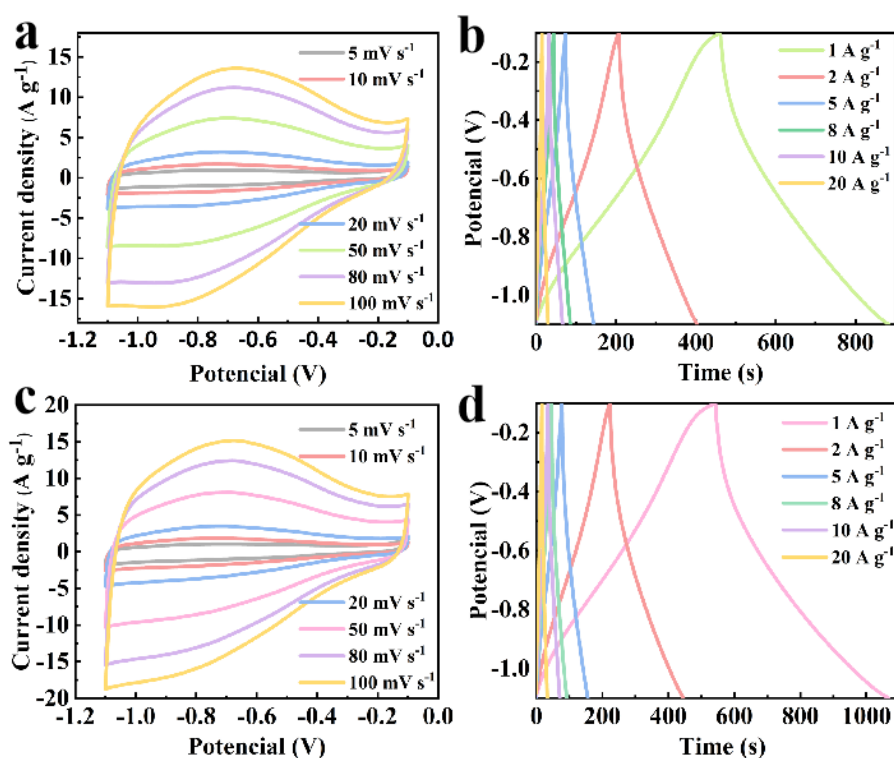

**Fig. S4** (a, c) The CV curves of CPC-600 and LPC-600. (b, d) The GCD curves of CPC-600 and LPC-600.

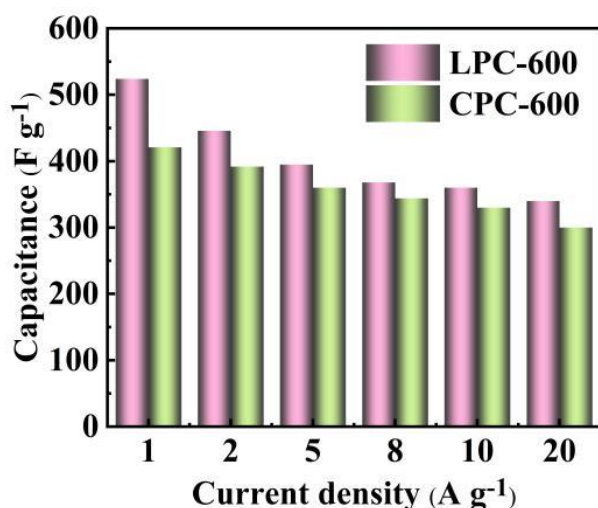

Fig. S5 The Cs at different current densities of LPC-600 and CPC-600.

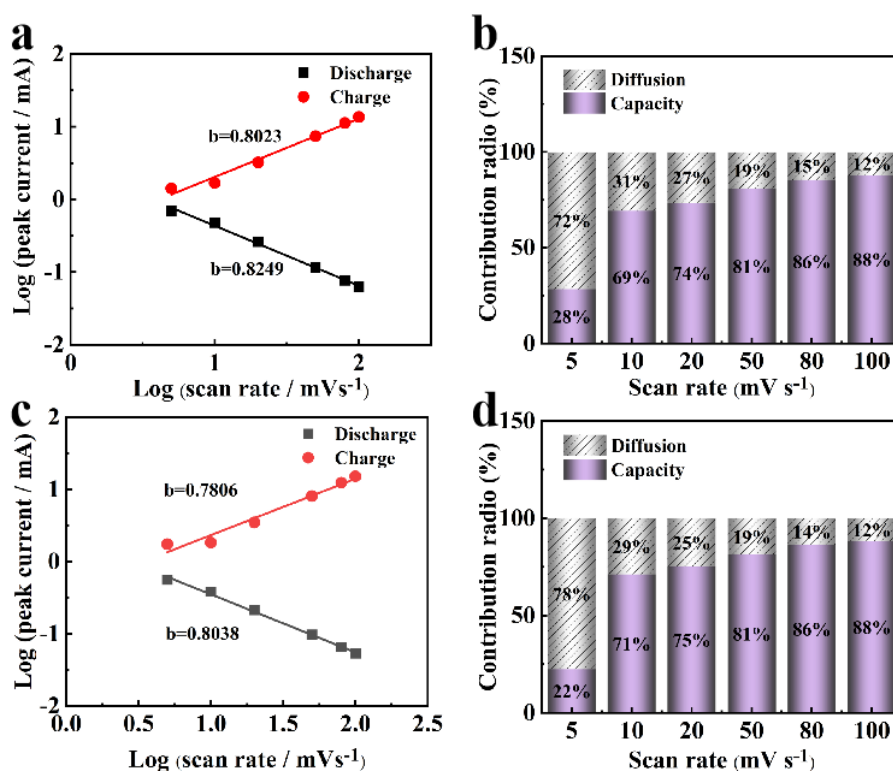

Fig. S6 (a, c) Power law dependence of positive and negative peak currents at different scan rates from 5 to 100 mV s<sup>-1</sup> for CPC-600 and LPC-600. (b, d) Contribution of CPC-600 and LPC-600 capacitance control capacity at different scan rates.

From Fig. S6a, it can be calculated that the  $b$  value of CPC-600 is between 0.5 ~ 1, which indicates that the two mechanisms coexist. Similarly, from Fig. S6c, it can be calculated that the  $b$  value of LPC-600 is less than CPC-600 and is also between 0.5 ~

1. This shows that the LPC-600 electrode has a larger proportion of pseudocapacitance, but the surface control dynamics still dominate. As shown in Fig. S6b and d, as the sweep speed increases, so does the contribution of the surface-controlled electrical double-layer capacitors. The maximum surface control ratio of CPC-600 and LPC-600 reached 88%, which indicates that they have good cycle stability and rate performance.

The volumetric capacitive performance of CPC-500, CPC-600, CPC-700, LPC-500, LPC-600 and LPC-700 is  $142.5 \text{ F cm}^{-3}$ ,  $210.5 \text{ F cm}^{-3}$ ,  $177.5 \text{ F cm}^{-3}$ ,  $196.0 \text{ F cm}^{-3}$ ,  $262.0 \text{ F cm}^{-3}$  and  $222.5 \text{ F cm}^{-3}$ .

#### 4. Electrochemical characterization of the SSCs

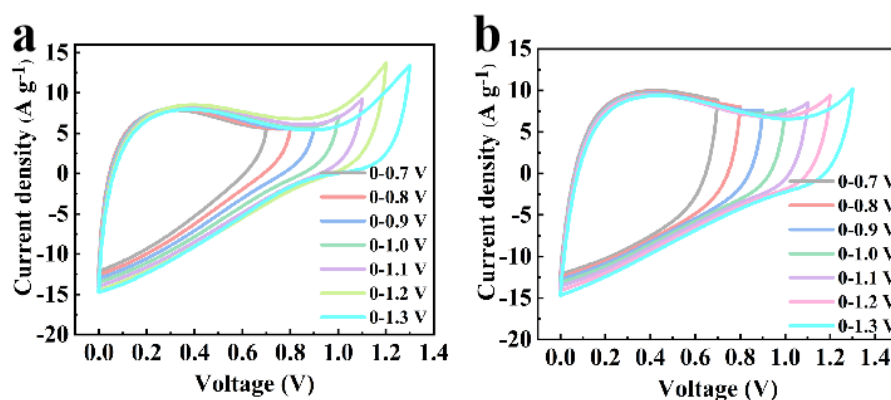

**Fig. S7** Electrochemical performance of supercapacitors in a 6 M KOH electrolyte. (a, b) The CV curves of CPC-600 SSC and LPC-600 SSC at  $50 \text{ mV s}^{-1}$  at various voltage regions (0.7 to 1.3 V).

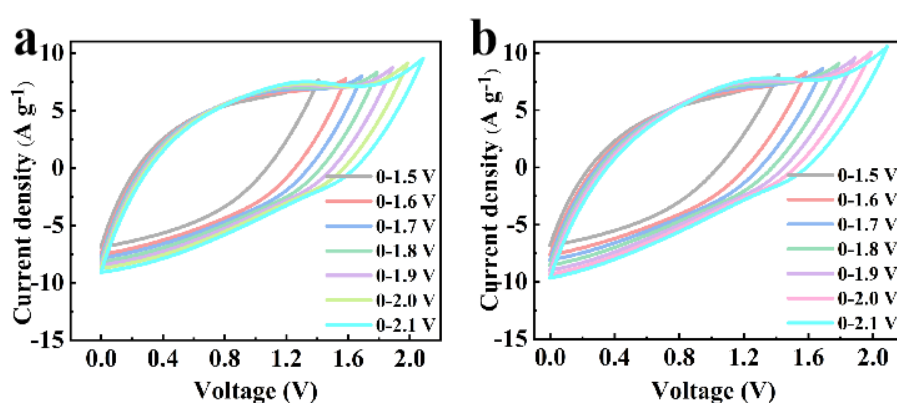

**Fig. S8** Electrochemical performance of supercapacitors in a 1 M  $\text{Na}_2\text{SO}_4$  electrolyte. (a, b) The CV curves of CPC-600 SSC and LPC-600 SSC at  $50 \text{ mV s}^{-1}$  at various voltage regions (1.5 to 2.1 V).

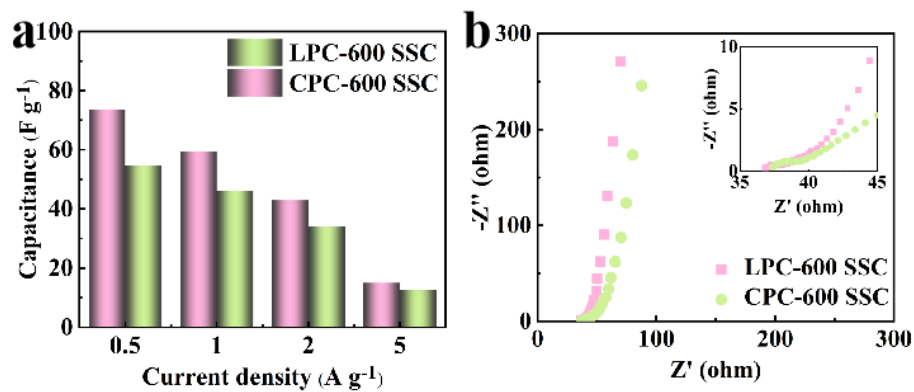

**Fig. S9** (a) The  $C_s$  at different current densities of CPC-600 SSC and LPC-600 SSC. (b) Nyquist diagram of the CPC-600 SSC and the LPC-600 SSC in 1 M Na<sub>2</sub>SO<sub>4</sub>.

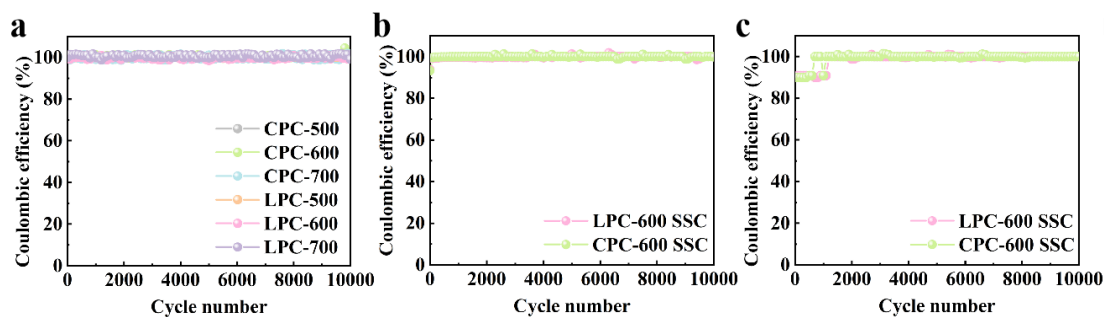

**Fig. S10** The Coulomb efficiency of (a) all samples in 6 M KOH in a three-electrode system, (b) two SSCs in 6 M KOH and (c) two SSCs in 1 M Na<sub>2</sub>SO<sub>4</sub>.
